# Supplementary material
Source: Research Square preprint supplement (doi:10.21203/rs.3.rs-10021337/v1)
Supplement: Supplementary file 1 [file c2e8637ef5fbc6d7318ad6d2.docx]

**Appendix S1**

**In-depth Interview Guide**

**Exploring belief-based denial of Medical Assistance in Dying (MAiD) in Canada**

**General information**

Thank you for taking the time to speak with me today. [If participant consents to audio-recording] I am going to turn on the recorder now. Again, please let me know if you want me to turn off the recorder at any point during the interview. My name is [interviewer introduction].

1. I’d like to begin by asking you to tell me a little bit about yourself (or your family member). Race, age, education, occupation, location
2. Tell me a little bit about your (and your family member’s) current living arrangements
3. Please tell me a little bit about your (or your family member’s) sources of (emotional) support

**General health history**

Now I’d like to ask you some questions about your health history

1. How would you characterize your (or your family member’s) health, overall?
2. Please tell me about any important health concerns in your (or your family member’s) life. What conditions do you (they) have?
3. **Ask MAiD denied person**: I’m going to ask you about the specific MAiD experience in a minute, but can you tell me about your health history more generally? What treatment have you been taking? Where and what doctors or health care providers do you have?
4. **Ask MAiD denied person**: Can you tell me about your (their) health insurance coverage? Barriers of insurance of affordability?

**Experience(s) with belief-based denial of MAiD**

Now, I would like you to tell me about your refusal/denial experience(s), starting with the earliest (Review definition of belief-based denial/conscientious objection, if necessary).

1. To begin, please tell me about the circumstances surrounding the first experience of MAiD that you (or your family member) sought but were refused/denied (give date/year).

Decision-making around MAiD

1. Now, I’d like you to tell me about the refusal/denial itself
2. Please tell me what happened after the denial/refusal?
3. Did you (or your family member) tell anyone about the denial/refusal experience?
4. **Ask MAiD denied person**: How has the refusal/denial affected you?
5. **Ask family member**: What has been the impact of the denial on the family? How has the refusal/denial affected your family member?
6. How would you describe your feelings (and your family members) about the refusal/denial of care?

Questions are repeated for all the times that MAiD was refused/denied on/after June, 2016

**Ways that services could be improved**

Thank you so much – we are almost done! I’d now like to ask you some questions about how services might be improved for individuals seeking MAiD in Canada.

1. Reflecting on your experience, how might services be improved for people in Canada and particularly in your province?
2. How do you feel about the reality that providers in some provinces can chose to deny MAiD on the basis of belief?

**Conclusion**

Thank you so much! That’s all of the questions that I have.

1. Is there anything that you would like to add?
2. Is there anything I should have asked about but didn’t?
3. Do you have any questions for me?

Thank you again for participating in our study.  You will receive your CAD 40 thank you gift certificate within 48 hours.  Please don’t hesitate to contact us if you have any questions.

If the participant appears distressed at any point in the interview or if you feel that she/they requires additional support, please refer to All Options:

Phone: 1-888-493-0092; Website: <https://www.all-options.org/find-support/talkline/>
